# Supplementary material
Source: publisher figshare collection journal article supplement (https://sage.figshare.com/ndownloader/files/20186334)
Supplement: Supplementary file 1 [file 20186334]

**Supplementary Table 2.** CASP Quality Appraisal of Included Studies

|                                | 1 | 2 | 3 | 4  | 5 | 6  | 7  | 8  | 9 | 10 |
|--------------------------------|---|---|---|----|---|----|----|----|---|----|
| Clancy et al., 2015            | Y | Y | Y | Y  | Y | CT | Y  | Y  | Y | Y  |
| Larsson et al., 2009           | Y | Y | Y | Y  | Y | CT | CT | Y  | Y | Y  |
| Smith, 2012                    | Y | Y | Y | Y  | Y | CT | Y  | Y  | Y | Y  |
| Hinck, 2004                    | Y | Y | Y | Y  | Y | CT | Y  | Y  | Y | Y  |
| Sjoberg et al., 2017           | Y | Y | Y | Y  | Y | CT | Y  | Y  | Y | Y  |
| Pardo et al., 2018             | Y | Y | Y | Y  | Y | CT | Y  | Y  | Y | Y  |
| van Wijngaarden et al., 2015   | Y | Y | Y | Y  | Y | CT | Y  | Y  | Y | Y  |
| Pusztai, 2015                  | Y | Y | Y | Y  | Y | Y  | Y  | Y  | Y | Y  |
| Hovbrand et al., 2007          | Y | Y | Y | Y  | Y | CT | Y  | CT | Y | Y  |
| Fischer et al., 2008           | Y | Y | Y | Y  | Y | Y  | Y  | Y  | Y | Y  |
| Haggbloom-Kronlof et al., 2007 | Y | Y | Y | Y  | Y | CT | Y  | CT | Y | Y  |
| Nygren et al., 2007            | Y | Y | Y | Y  | Y | Y  | Y  | Y  | Y | Y  |
| Bergland & Slettebo, 2015      | Y | Y | Y | Y  | Y | CT | Y  | Y  | Y | Y  |
| Nilsson et al., 2003           | Y | Y | Y | Y  | Y | Y  | Y  | Y  | Y | Y  |
| Ness et al., 2014              | Y | Y | Y | Y  | Y | CT | Y  | Y  | Y | Y  |
| Saarnio et al., 2017           | Y | Y | Y | Y  | Y | CT | Y  | Y  | Y | Y  |
| Gudmannsdottir et al., 2009    | Y | Y | Y | Y  | Y | CT | Y  | Y  | Y | Y  |
| Bruun-Olsen et al., 2018       | Y | Y | Y | Y  | Y | Y  | Y  | Y  | Y | Y  |
| Caldras & Bertero, 2007        | Y | Y | Y | CT | Y | CT | Y  | Y  | Y | Y  |

1. Was there a clear statement of the aims of the research?
2. Is a qualitative methodology appropriate?
3. Was the research design appropriate to address the aims of the research?
4. Was the recruitment strategy appropriate to address the aims of the research?
5. Were the data collected in a way that addressed the research issue?
6. Was the relationship between the researcher and participants adequately addressed?
7. Have ethical issues been taken into account?
8. Was the data analysis sufficiently rigorous?
9. Is there a clear statement of findings?
10. Is the research valuable?

**Y** = YES | **N** = NO | **CT** = Can't Tell
